# Supplementary material for: Long-Term Persistence of Mitochondrial DNA Instability among HCV-Cured People Who Inject Drugs
Source: MDPI journal article supplement (doi:10.3390/biomedicines10102541), 2022-10-12
Supplement: s1 [file s1]

**Supplementary file:** Long-term persistence of mitochondrial DNA instability among HCV-cured people who inject drugs. Durand et al.

**Figure S1:** Flowchart of the study population

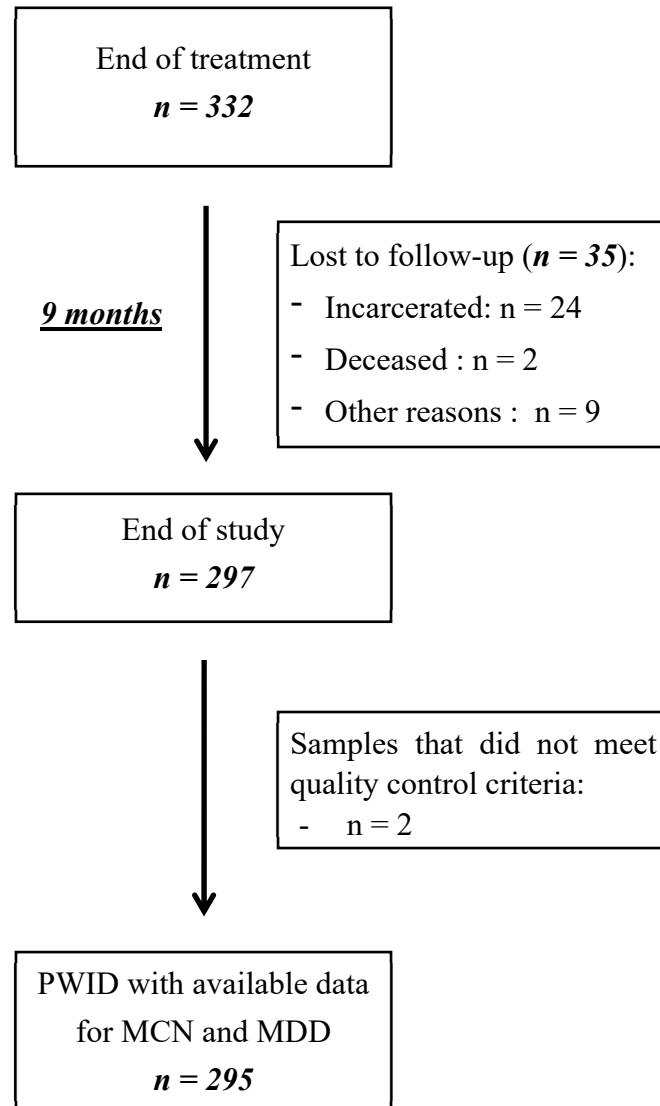

**Table S1:** Factors associated with high MCN loss.

|                                                          |            |  | UNIVARIATE        |          | MULTIVARIATE      |          |
|----------------------------------------------------------|------------|--|-------------------|----------|-------------------|----------|
|                                                          | n(%)       |  | RR [95%CI]        | p-values | aRR [95%CI]       | p-values |
| <b>SOCIO-DEMOGRAPHIC DATA</b>                            |            |  |                   |          |                   |          |
| <b>Age</b>                                               |            |  |                   | 0.12     |                   | 0.15     |
| Under 35 years                                           | 37 (12.5)  |  | Ref.              |          | Ref.              |          |
| 35 to 45 years                                           | 164 (55.6) |  | 1.16 [0.70; 1.93] |          | 1.14 [0.69; 1.88] |          |
| 45 to 55 years                                           | 72 (24.4)  |  | 0.68 [0.36; 1.29] |          | 0.68 [0.36; 1.28] |          |
| Over 55 years                                            | 22 (7.4)   |  | 1.12 [0.54; 2.31] |          | 1.03 [0.48; 2.22] |          |
| <b>TREATMENTS</b>                                        |            |  |                   |          |                   |          |
| <b>Previous exposure to DAA</b>                          |            |  |                   | 0.68     |                   | 0.83     |
| SOF400/DCV60                                             | 149 (50.5) |  | Ref.              |          | Ref.              |          |
| SOF400/DCV90                                             | 119 (40.3) |  | 1.14 [0.81; 1.61] |          | 1.10 [0.78; 1.55] |          |
| SOF400/DCV/RBV                                           | 27 (9.1)   |  | 1.20 [0.69; 2.08] |          | 1.22 [0.69; 2.15] |          |
| <b>ARV exposure</b>                                      |            |  |                   | 0.27     |                   |          |
| Not receiving ARV                                        | 158 (53.6) |  | Ref.              |          |                   |          |
| Receiving ARV treatment                                  | 137 (46.4) |  | 1.20 [0.87; 1.66] |          |                   |          |
| <b>Methadone maintenance therapy</b>                     |            |  |                   | 0.13     |                   | 0.11     |
| No                                                       | 36 (12.2)  |  | Ref.              |          | Ref.              |          |
| Yes                                                      | 259 (87.8) |  | 0.71 [0.47; 1.07] |          | 0.69 [0.46; 1.04] |          |
| <b>DRUG/SUBSTANCE CONSUMPTION</b>                        |            |  |                   |          |                   |          |
| <b>Heroin status at 9 months post-treatment</b>          |            |  |                   | 0.42     |                   |          |
| No use                                                   | 174 (59.0) |  | Ref.              |          |                   |          |
| Still injecting                                          | 121 (41.0) |  | 0.87 [0.62; 1.22] |          |                   |          |
| <b>Methamphetamine status at 9 months post-treatment</b> |            |  |                   | 0.43     |                   |          |
| No use                                                   | 262 (88.8) |  | Ref.              |          |                   |          |
| Still smoking                                            | 33 (11.2)  |  | 1.21 [0.77; 1.92] |          |                   |          |
| <b>Hazardous drinking* at 9 months post-treatment</b>    |            |  |                   | 0.98     |                   |          |
| No                                                       | 247 (83.7) |  | Ref.              |          |                   |          |
| Yes                                                      | 48 (16.3)  |  | 1.00 [0.65; 1.55] |          |                   |          |

\*: score above 4 for men or 3 for women on the AUDIT-C scale. All statistical tests were non-parametric tests.

**Table S2:** Factors associated with high MDD accumulation.

|                                                          |            |  | UNIVARIATE         |          | MULTIVARIATE       |          |
|----------------------------------------------------------|------------|--|--------------------|----------|--------------------|----------|
|                                                          | n(%)       |  | RR [95%CI]         | p-values | aRR [95%CI]        | p-values |
| <b>SOCIO-DEMOGRAPHIC DATA</b>                            |            |  |                    |          |                    |          |
| <b>Age</b>                                               |            |  |                    | 0.31     |                    | 0.28     |
| Under 35 years                                           | 37 (12.5)  |  | Ref.               |          | Ref.               |          |
| 35 to 45 years                                           | 164 (55.6) |  | 0.70 [0.46; 1.09]  |          | 0.71 [0.45; 1.11]  |          |
| 45 to 55 years                                           | 72 (24.4)  |  | 0.83 [0.52; 1.35]  |          | 0.81 [0.50; 1.32]  |          |
| Over 55 years                                            | 22 (7.4)   |  | 0.52 [0.22; 1.23]  |          | 0.49 [0.21; 1.15]  |          |
| <b>TREATMENTS</b>                                        |            |  |                    |          |                    |          |
| <b>Previous exposure to DAA</b>                          |            |  |                    | 0.36     |                    | 0.32     |
| SOF400/DCV60                                             | 149 (50.5) |  | Ref.               |          | Ref.               |          |
| SOF400/DCV90                                             | 119 (40.3) |  | 0.82 [0.57; 1.17]  |          | 0.84 [0.58 ; 1.20] |          |
| SOF400/DCV/RBV                                           | 27 (9.1)   |  | 1.17 [0.70; 1.93]  |          | 1.27 [0.76 ; 2.12] |          |
| <b>ARV exposure</b>                                      |            |  |                    | 0.21     |                    |          |
| Not receiving ARV                                        | 158 (53.6) |  | Ref.               |          |                    |          |
| Receiving ARV treatment                                  | 137 (46.4) |  | 0.81 [0.58 ; 1.13] |          |                    |          |
| <b>Methadone maintenance therapy</b>                     |            |  |                    | 0.66     |                    |          |
| No                                                       | 36 (12.2)  |  | Ref.               |          |                    |          |
| Yes                                                      | 259 (87.8) |  | 0.90 [0.56; 1.43]  |          |                    |          |
| <b>DRUG/SUBSTANCE CONSUMPTION</b>                        |            |  |                    |          |                    |          |
| <b>Heroin status at 9 months post-treatment</b>          |            |  |                    | 0.76     |                    |          |
| No use                                                   | 174 (59.0) |  | Ref.               |          |                    |          |
| Still injecting                                          | 121 (41.0) |  | 1.05 [0.76; 1.46]  |          |                    |          |
| <b>Methamphetamine status at 9 months post-treatment</b> |            |  |                    | 0.22     |                    |          |
| No use                                                   | 262 (88.8) |  | Ref.               |          |                    |          |
| Still smoking                                            | 33 (11.2)  |  | 1.34 [0.87; 2.07]  |          |                    |          |
| <b>Hazardous drinking* at 9 months post-treatment</b>    |            |  |                    | 0.29     |                    |          |
| No                                                       | 247 (83.7) |  | Ref.               |          |                    |          |
| Yes                                                      | 48 (16.3)  |  | 1.23 [0.84; 1.86]  |          |                    |          |

\*: score above 4 for men or 3 for women on the AUDIT-C scale. All statistical tests were non-parametric tests.
